# Supplementary material
Source: Springer Nature journal article supplement (https://www.springermedizin.de/resource/supplementary/12913_2010_1605_MOESM3_ESM.pdf/9529368)
Supplement: MOESM3 [file 9529368]

Table 2: Distribution of sample female sex workers' self-reported illness in the past 12 months prior to the study (in 2006)

| <b>Types of general health problems experienced</b> | <b>N (N=380) (%)</b> |
|-----------------------------------------------------|----------------------|
| STIs symptoms                                       | 117 (30.8)           |
| Fever                                               | 107 (28.2)           |
| Back-ache                                           | 93 (24.5)            |
| Headache                                            | 63 (16.6)            |
| General cold                                        | 52 (13.7)            |
| Diarrhoea                                           | 3 (0.8)              |
| Others                                              | 9 (2.3)              |

*Percentage total exceeds 100 due to multiple responses*
